# Supplementary material for: Contribution of Arbuscular Mycorrhizal Fungal Communities to Soil Carbon Accumulation during the Development of Cunninghamia lanceolata Plantations
Source: MDPI journal article supplement (doi:10.3390/f13122099), 2022-12-09
Supplement: s1 [file s1]

Archive with 1 entries (1 files):
- forests-2014980-supplementary.pdf
