# Supplementary material for: Contribution of Arbuscular Mycorrhizal Fungal Communities to Soil Carbon Accumulation during the Development of Cunninghamia lanceolata Plantations
Source: MDPI journal article supplement (doi:10.3390/f13122099), 2022-12-09
Supplement: s1 [file s1 › forests-2014980-supplementary.pdf]

## Supplementary information

**Table S1.** Details of the sampling sites of *C. lanceolata* plantations.

| Sites  | Age (year) | Slope gradient | Slope orientation | Average height (m) | Average basal diameter (cm) | Understory plants     |
|--------|------------|----------------|-------------------|--------------------|-----------------------------|-----------------------|
| Young  | 5          | 32°            | E                 | 7.5                | 10.6                        | <i>I. pubescens</i>   |
| Middle | 17         | 35°            | E                 | 14.5               | 15.6                        | <i>D. dichotoma</i>   |
| Mature | 40         | 30°            | E                 | 27.2               | 23.1                        | <i>M. dodecandrum</i> |

*I. pubescens*: *Ilex pubescens*; *D. dichotoma*: *Dicranopteris dichotoma*; *M. dodecandrum*: *Melastoma dodecandrum*

**Table S2** Soil chemical properties in different *C. lanceolata* plantations

| Matrix                    | Young       | Middle      | Mature      |
|---------------------------|-------------|-------------|-------------|
| pH                        | 4.47±0.14a  | 4.38±0.14a  | 4.37±0.03a  |
| Soil moisture (%)         | 10.37±1.68c | 16.86±0.93a | 12.81±1.57b |
| SOC (g kg <sup>-1</sup> ) | 10.07±0.56b | 8.48±0.93c  | 12.11±0.89a |
| TN (g kg <sup>-1</sup> )  | 1.46±0.12a  | 1.19±0.09b  | 1.14±0.09b  |
| AN (g kg <sup>-1</sup> )  | 11.74±1.13a | 12.23±0.40a | 10.98±0.48a |
| AP (g kg <sup>-1</sup> )  | 2.83±0.37a  | 2.63±0.22ab | 2.22±0.27b  |
| AK (g kg <sup>-1</sup> )  | 147.2±18.7b | 231.2±23.4a | 145.4±14.9b |
| DOC (g kg <sup>-1</sup> ) | 160.2±12.8b | 204.6±22.6a | 142.5±19.9b |

Values are mean±SD. Different letters in the same column indicate significant difference ( $P<0.05$ ).

**Table S3** Soil AM fungal sequences and OTUs in each soil sample at different age of *C. lanceolata* plantations.

| Stand age | Sequence | OTU number |
|-----------|----------|------------|
| Young 1   | 35322    | 31         |
| Young 2   | 30692    | 29         |
| Young 3   | 39034    | 29         |
| Young 4   | 25727    | 24         |
| Young 5   | 29885    | 27         |
| Middle 1  | 34015    | 42         |
| Middle 2  | 36759    | 37         |
| Middle 3  | 16807    | 40         |
| Middle 4  | 3506     | 22         |
| Middle 5  | 21312    | 45         |
| Mature 1  | 49280    | 38         |
| Mature 2  | 24070    | 37         |

|          |       |    |
|----------|-------|----|
| Mature 3 | 10218 | 41 |
| Mature 4 | 22208 | 47 |
| Mature 5 | 27628 | 44 |

**Table S4** Correlations between the AM fungal community composition and AM fungal groups and GRSP contents

| Matrix      | NMDS<br>axis1<br>(bray-<br>Curtis) | NMDS<br>axis1<br>(unifrac) | Glomerace<br>ae | Gigasporace<br>ae | Acaulospora<br>ceae |
|-------------|------------------------------------|----------------------------|-----------------|-------------------|---------------------|
|             |                                    |                            |                 |                   |                     |
| EE-<br>GRSP | <b>0.732**</b>                     | <b>0.779**</b>             | -0.090          | -0.05             | 0.402               |
| T-GRSP      | <b>0.679**</b>                     | <b>0.566**</b>             | 0.011           | -0.226            | <b>0.630*</b>       |

Significant values were shown in bold. \*,  $p < 0.05$ ; \*\*,  $p < 0.01$

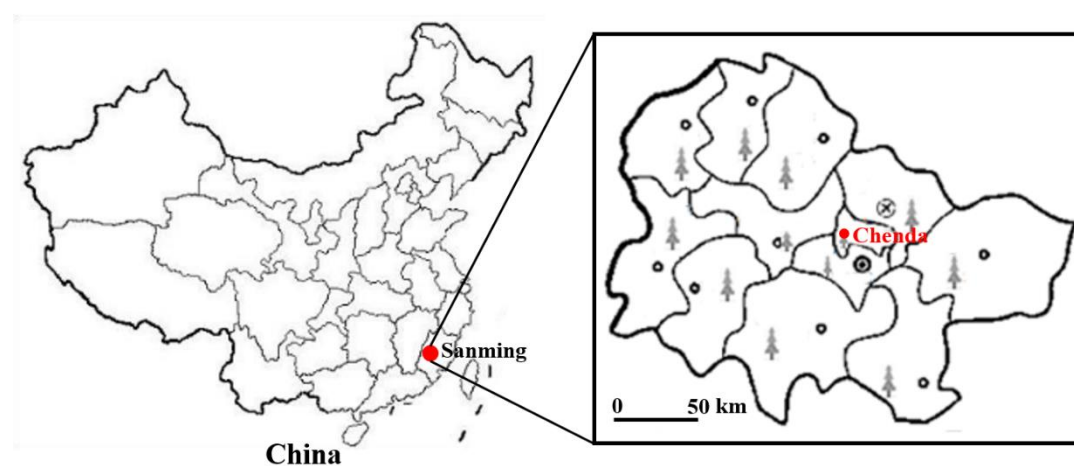

**Figure S1** Location of study area in Sanming city, Fujian Province, China

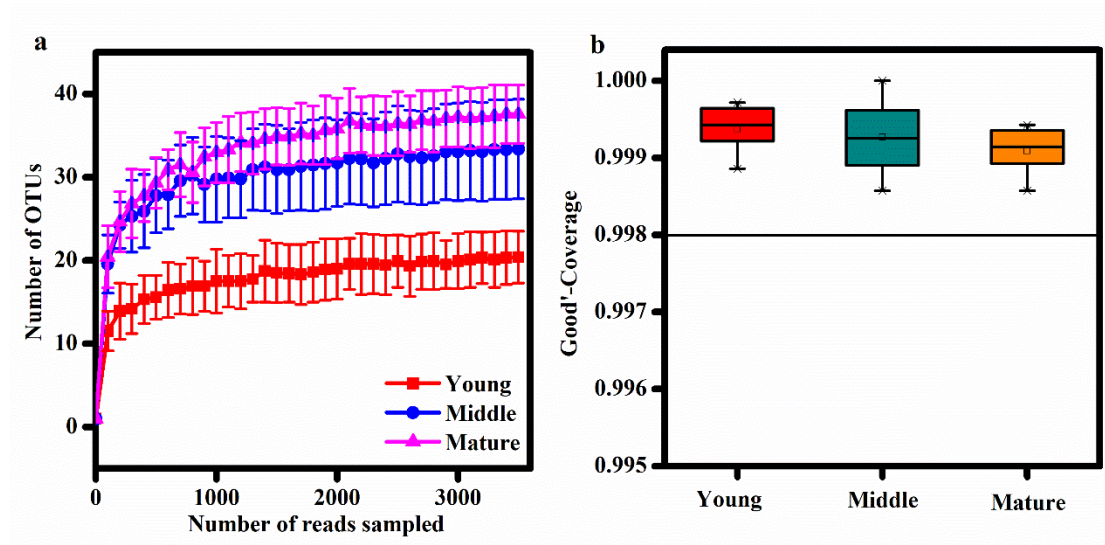

**Figure S2** Rarefaction curves of observed bacterial OTUs (a) and good's coverage (b) among different age of *C. lanceolata* plantations.

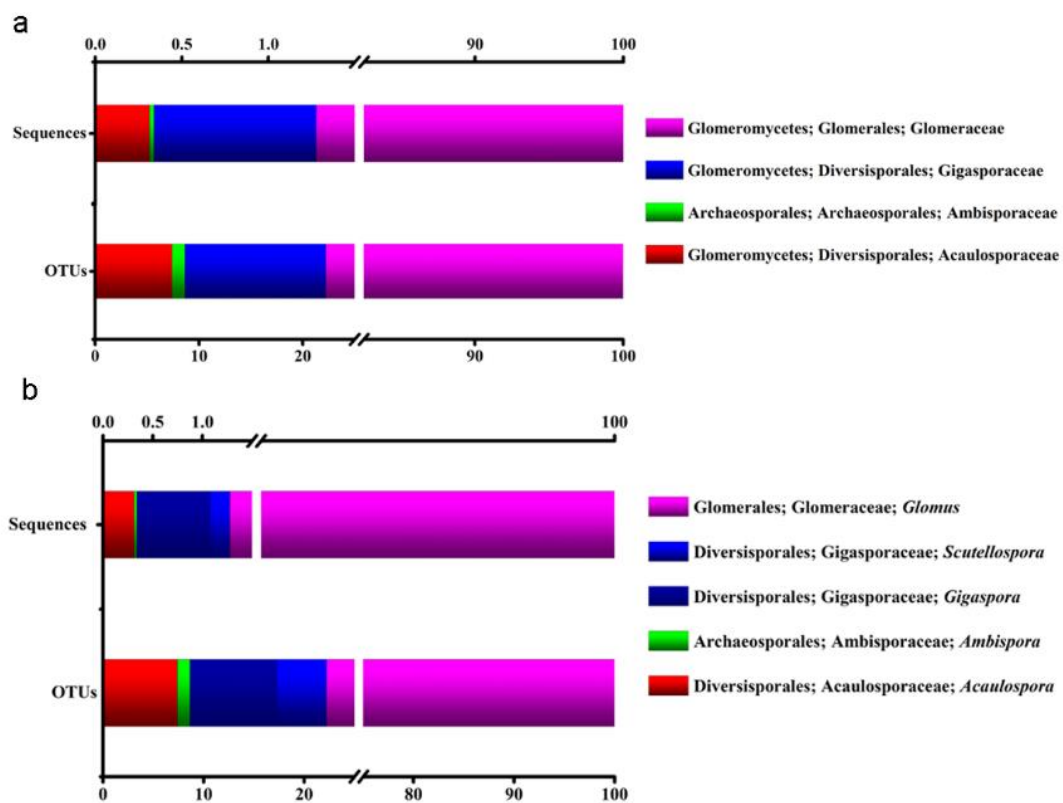

**Figure S3** Taxonomic composition of soil bacterial communities at the family (a) and genus (b) levels under different age of *C. lanceolata* plantations.

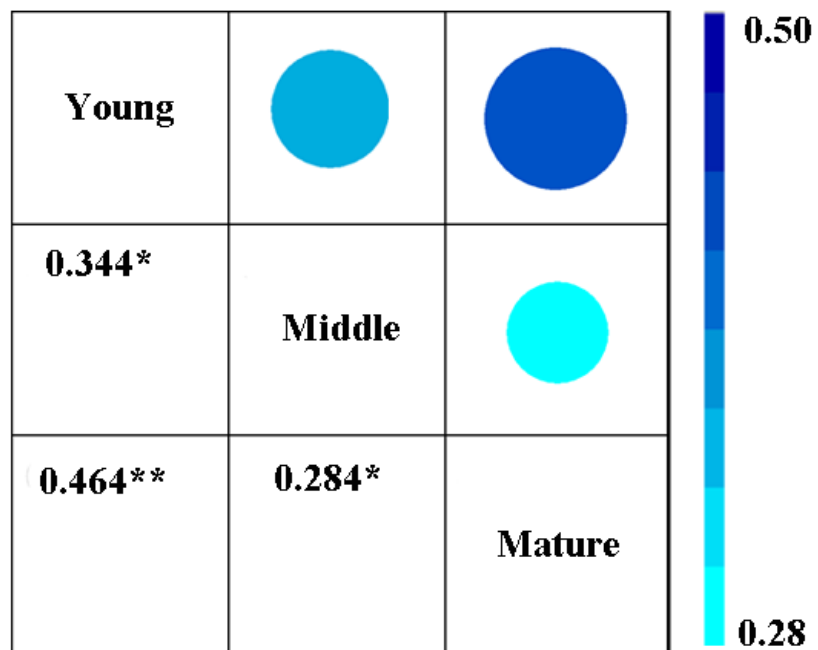

**Figure S4** Significant test of bacterial community composition between different ages of *C. lanceolata* plantations based on PerMANOVA analysis.

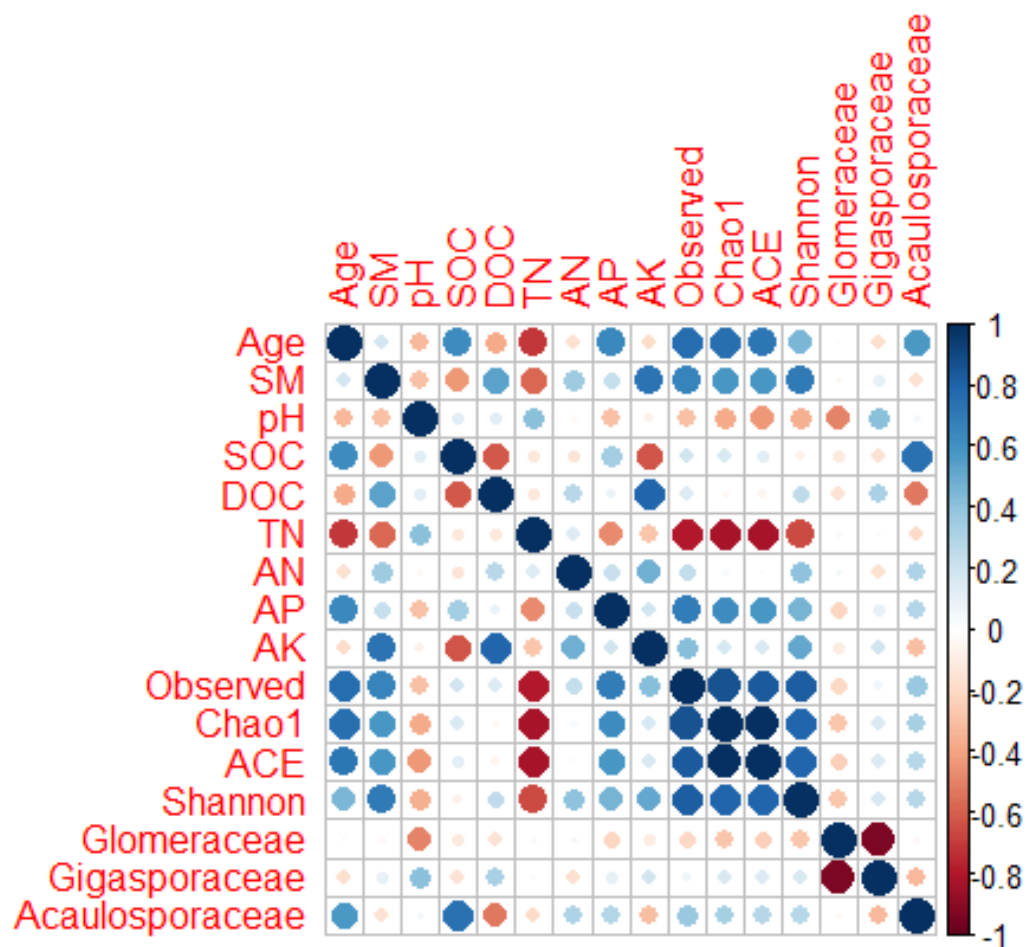

**Figure S5** Correlation analysis between environmental factors and AM fungal diversity and relative abundances of AM fungal families in different ages of *C. lanceolata* plantations.
